# Supplementary material for: Sensitivity to BUB1B Inhibition Defines an Alternative Classification of Glioblastoma
Source: Oxford University Press journal article supplement (doi:10.1158/0008-5472.can-17-0736), 2017-08-30
Supplement: 00085472can170736-sup-180295_2_supp_4222845_44w4xz.docx [file 00085472can170736-sup-180295_2_supp_4222845_44w4xz.docx]

**Supplementary data for**

**Sensitivity to BUB1B inhibition defines an alternative classification of glioblastoma**

Eunjee Lee1,2, Margaret Pain3, Huaien Wang3, Jacob A. Herman4, Chad M. Toledo5,6, Jennifer G. DeLuca4, Raymund L. Yong3, Patrick Paddison5,6, and Jun Zhu1,2,7*

1Department of Genetics and Genomic Sciences; 2Icahn Institute of Genomics and Multiscale Biology; 3Department of Neurosurgery, Icahn School of Medicine at Mount Sinai, New York, NY 10029; 4Department of Biochemistry and Molecular Biology, Colorado State University, Fort Collins, CO 80523; 5Human Biology Division, Fred Hutchinson Cancer Research Center, Seattle, WA 98109; 6Molecular and Cellular Biology Program, University of Washington, Seattle, WA 98195; 7Sema4 Genomics, Icahn School of Medicine at Mount Sinai, New York, NY 10029;

*All corresponds should be addressed to Dr. Jun Zhu, One Gustave L. Levy Place, PO. Box 1498, New York, NY 10029, USA, e-mail: jun.zhu@mssm.edu

**List of Supplementary Data:**

Supplementary Materials and Methods

SupplementaryFig. S1. Principal component analysis (PCA) of gene expression levels.

SupplementaryFig. S2. Gene set enrichment analysis of the 838 BUB1BS/R-associated genes.

SupplementaryFig. S3. Cross-validation of the elastic net classifier.

SupplementaryFig. S4. Expression features based on tumor tissue and GSC.

SupplementaryFig. S5. Association between predicted BUB1B-inhibition sensitivity values and clinical information.

SupplementaryFig. S6. BUB1BS and BUB1BR-specific sub-networks.

SupplementaryFig. S7. Expression difference between BUB1BS GSCs and BUB1BR GSCs.

SupplementaryFig. S8. The Predicted BUB1B-inhibition sensitivity values of glioma cell lines.

SupplementaryFig. S9. Boxplot of drug sensitivity for glioma cell lines.

Supplementary Fig. S10. Application of BUB1BR/S classifier to single cell RNA-seq data of two stemlike tumor-propagating glioblastoma cells (GBM6 and GBM8).

Supplementary Fig. S11. Application of BUB1BR/S classifier to single cell RNA-seq data.

Supplementary Fig. S12. The application of BUB1B classifier to population controls SupplementaryTable S1. Summary of GSC samples and prediction of BUB1B sensitivity for GSC cell lines based on expression levels.

SupplementaryTable S2. Composition of each cell type based on tumor tissue expression levels.

SupplementaryTable S3. Association betweenBUB1BS/R status and survival rate.

Supplementary Table S4. Normalized cell growth (%) of 9217B and 10647B for etoposide treatment.

References

**Supplementary Materials and Methods**

**Culture protocol for GSCs and NSC that were previously published**

GSC and NSC lines were grown in N2B27 neural basal media (STEMCELL Technologies) supplemented with EGF and fibroblast growth factor 2 (FGF-2) of 20 ng/mL each (Peprotech), on laminin-coated polystyrene plates (Sigma) and passaged according to Pollard and colleagues ([1](#_ENREF_1)). NHA (STEMCELL Technologies) and NHA-Ras cells (Russell Pieper, University of California San Francisco, San Francisco, CA) were grown in astrocyte growth medium (Clonetics) according to the manufacturer's instructions and published protocols ([2](#_ENREF_2)).

**Culture protocol for GSCs from Mount Sinai Hospital**

Fresh surgical specimens were washed in PBS containing 2% penicillin-streptomycin-neomycin solution (Gibco cat #15640-55) and 1.5% antifungal solution (Gibo cat #15290-026). Tumor tissue was isolated from blood vessels using a sterile scalpel, minced finely, and digested in 20 ml 0.05% trypsin-EDTA (Gibco cat #25300-054) for 20 minutes at 37C with mixing every 5 minutes. Bovine pancreatic DNase I (Sigma cat #D4263) was added and the tissue was incubated for an additional 10 minutes. After centrifugation at 500g for 5 minutes, the supernatant was removed, the pellet resuspended in 25 ml DMEM/F12 medium (Gibco cat #11330-032), and the resulting mixture filtered through a cell strainer (Falcon cat #352360). Cells were then centrifuged again at 500g for 5 minutes and resuspended in 5 ml NeuroCult NS-A Proliferation Medium (Stemcell cat #05751) supplemented with recombinant human EGF (20 ng/ml, R&D cat #236-EG), bFGF (10 ng/ml, R&D cat #233-FB), and 0.0002% heparin (Stemcell cat #07980). Cells were transferred to T25 tissue culture flasks (Corning cat #430639). The medium was changed after 48 hours and then every 3-4 days thereafter. The number of passages is between 6-10: 6 passages for 10647A, 10647B, and 10647C; 8 passages for 7653B; 10 passages for 9212A, 9212B, 9217A, 9217B, and 9260B.

**Detection of BUB1BR/S status and IKD measurement in GSC cell lines**

The BUB1B-inhibition assay was described in Ding et al ([3](#_ENREF_3)) and Toledo et al. ([4](#_ENREF_4)). In short, the pGIPZ lentivirus containing shRNAs targeting BUB1B or scrambled sequence were used to infect GSCs. After 7 days under standard growth conditions, the cell proliferative rate was measured using AlamarBlue reagent (Invitrogen). For analysis, shRNA-containing samples were normalized to their respective shControl samples. The procedure for measuring IKD was previously described ([5](#_ENREF_5)). In short, cells will be immuno stained with rabbit anti-Hec1 and CREST anti-serum (Immunovision) at 1:500 dilutions and imaged on DeltaVision fluorescence microscope and deconvolved with Applied Precision's SoftWorx package. KT pairs were identified using KT and centromere staining. IKDs were measured as the distance between Hec1 peak fluorescence intensities on a line-scan of the KT pair. The results suggested that IKDs occur in discrete intervals: long (~1.24μm) and short (~1.12μm). This analysis revealed 9 BUB1BS isolates, 4 BUB1BR isolates, and 5 isolates that had not been tested for BUB1BR/S but which had RNA-seq data available (**Table S1**). We removed one GSC (i.e. G25) from our further analysis due to its low number of mapped sequences for all three replicates (**Table S1**), resulting 4 GSC isolates of unknown BUB1BR/S status.

**Preprocessing of RNA-seq data**

All RNA-seq data were processed using the following procedure. First, sequencing reads were aligned to the human reference genome hg19 using TopHat ([6](#_ENREF_6)). Next, the resulting aligned reads were analyzed by Cufflinks ([7](#_ENREF_7)) with reference genome. Cufflinks assembled the aligned reads into transcripts with reference genome and reported the expression of those transcripts in Fragments Per Kilobase of exon per Million fragments mapped (FPKM). FPKM is an expression of the relative abundance of transcripts. FPKM+1 values were used for allowing log transformation, and were log transformed in our subsequent analysis.

**Prediction of BUB1BS/R status**

We first identified genes whose expression levels were significantly associated with BUB1BS/R status. To identify the associated genes, we designed a multiple linear model to explain the variation in mRNA expression level for each gene in terms BUB1BS/R status and cell types as covariate by fitting the following model:

Here, represents the observed expression level of the gene *g* for a sample *s*. , , and indicates whether the type of cell is NSC, GSC, or astrocyte, respectively, while indicates whether the sample *s* was detected as BUB1BR or BUB1BR. The associated gene list was defined by its significance level of the coefficients from the multivariate fit. We selected the gene whose significant level is at FDR <1% (corresponding p-value <10-3.9).

With the defined the gene list associated with BUB1BS/R status, we predicted BUB1BS/R status by the following two steps. First, we trained a classifier with the GSC samples whose BUB1BS/R status was determined. We used the elastic net with the expression levels of genes associated with BUB1BS/R status. The elastic net is a generalization of ridge regression and the lasso, and a regularization method for fitting a generalized linear model ([8](#_ENREF_8)), as implemented in the R package *glmnet* ([9](#_ENREF_9)). The objective function of the elastic net takes the form of ‘loss + penalty’:

,

where and are the coefficients of the GLM, *N* is the number of samples, is the weight of observation *i*, is the negative log-likelihood contribution of observation *i*, represents the regularization parameter, which controls the amount of shrinkage, represents the elastic net penalty, which controls the balance between ridge and lasso regression. is the L2-norm and is the L1-norm of . Here, we used equal weights for all observation. We performed cross-validation to determine how the performance of the classifier depends on the regularization parameter of the elastic net, and determined the regularization parameter and the elastic net penalty . We used 5-fold cross-validation with 5 repeats.

Next, the elastic net classifier with the pre-determined parameter of and was used to predict BUB1BS/R status based on new sample’s expression levels. The expression profiles of different platforms (e.g. Affymetrix, RNAseq, Agilent etc) have fundamentally different distributions, resulting in false prediction of BUB1BS/R status based on expression profiles measured by the different one used in training the elastic net classifier. Therefore, if the expression profiles of the new samples were not measured by the same platform as the one used for training the elastic net classifier (i.e. not RNAseq), we transformed the new expression data (see Refine the BUB1BS/R classifier for different profiling platforms section for details). A significant positive predictive value of a sample indicates that the sample belongs to BUB1BS subtype; a significant negative predictive value indicates the sample-inhibition was predicted as BUB1BR subtype. The significance level of predictive value was computed by random permutation of each sample’s expression levels 500 times. We measured the predictive values of elastic net classifier for the permuted data, and computed FDR for the BUB1BS subtype at a given predictive value as the ratio the number of samples with above (or below for the BUB1BR subtype) predictive values, averaged over 500 randomized data sets.

**Refine the BUB1BS/R classifier for different profiling platforms**

Different expression profiling platforms (e.g. Affymetrix, RNAseq, Agilent etc) have fundamentally different distributions. If the expression profiling platform used for the new sample we want to predict is different from the one used in training elastic net classifier (i.e. RNAseq), this results in false prediction of BUB1BS/R status. Therefore, in this case, we transformed the expression profiles of sample we want to predict into the one whose distribution was similar to the elastic net classifier. For TCGA data, GBM patients were measured in three different platforms; Affymetrix, RNAseq and Agilent. There are 150 common samples whose expression profiles measured RNAseq and Agilent, and 151 for RNAseq and Affymetrix. Based on these samples’ expression levels, we transformed Agilent and Affymetrix expression levels into RNAseq expression levels. We fitted following linear regression for each gene: , where and represents expression level of gene *g* measured by RNAseq and Affymetrix/Agilent, respectively. The coefficients and were used to linearly transform the expression levels of other samples. We filtered out genes with low correlation between gene expression levels from RNAseq and other platforms at Bonferroni corrected p-value 0.05. We obtained 96% and 88% of genes and used them for refining the elastic net classifier and prediction for Agilent and Affymetrix, respectively.

**Extracting molecular profiles of GBM tumor cells from tumor tissue expression**

We hypothesized the expression levels of bulk tumor tissue can be explained as the linear combination of signature of each cell type as follows:

,

where *yg,s* represents the expression level of gene *g* and sample *s*, *Xk,g* represents expression level of cell type *k* for gene *g*. The error ε can be divided into two parts, GBM tumor cellss (expected similar to GSC), *pGSC* xε and normal cell types (1*-*pgsc)x*ε*, and can be measured by the difference between *yg,s* and weighted summation of each cell signature. The sample specific molecular profile of GBM tumor cells (expected similar to GSC) is defined as follows:

.

The sample specific molecular profile of GBM tumor cells (expected similar to GSC) was used for predicting BUB1BS/R status for each sample.

**Genome-wide shRNA screens**

ShRNAs were obtained from the RNAi Shared Resource (FHCRC) or Open Biosystems (Huntsville, AL) in the pGIPZ lentiviral vector. For virus production pGIPZ-shRNA plasmids were transfected into 293T cells along with psPAX and pMD2.G packaging plasmid to produce lentivirus. ~24 hours after transfection, neural stem cell expansion medium was added to replace original growth medium. Virus was harvested 24 hours after medium change and stored at -80C. GSCs and NSCs were infected at multiplicity of infection (MOI) <1 and selected with 1-4μg of puromycin for 2-4 days, depending on the target cell type.

The shRNA screen and Bar-code array analysis was performed as previously described ([10](#_ENREF_10)). Three GSC cell (G166, 0131, 0827) and one NSC cell (CB660) were infected with pools of lentiviral shRNAs and analyzed after 21 days of outgrowth for alterations in shRNA representation (n=3). For each population shRNAs were amplified using a half-shRNA PCR strategy from genomic DNA representing ~5M cells (~33μg). Illumina sequencing adaptors were ligated onto purified shRNA PCR products (Illumina kit) and used on an Illumina HiSeq 2000 sequencer (Genomics facility, FHCRC). The resulting reads were mapped onto a reference library containing library shRNA sequences and filtered (phred score= 37). Mapped reads were tallied and compared using two R/Bioconductor packages, edgeR, developed for RNA-seq analysis, and limma, developed for microarray analysis. Both comparisons subtracted control from experimental replicates to calculate logFC and used the Benjamini-Hochberg FDR calculation to adjust p-values for multiple comparisons.

**Identification of genes required for the expansion of BUB1BS and BUB1BR GSCs.**

First, we detected each isolate’s candidate targets as shRNAs underrepresented in GSCs relative to NSCs, resulting 1061, 1133, 1045 candidate lethal genes at adjust p-value <0.05 and |log2(Fold-change)|>0.585, for GSC-G166, GSC-0131, and GSC-0827 respectively. Based on these candidate lists, we identified candidate targets only required for expansion of BUB1BS GSCs as the common candidates of GSC-G166 and GSC-0131 but not of GSC-0827, and those of BUB1BR GSCs as the candidates of GSC-0827 but neither of GSC-G166 and GSC-0131. This yielded differentially required 122 and 757 candidate targets of BUB1BS GSCs and BUB1BR GSCs, respectively. We further extracted the candidate lethal targets of BUB1BR GSCs because 757 candidate targets are likely to include 0827 specific lethal genes. We tested whether the each candidate target’s expression level of 0827 isolate were inherited from the expression level of other BUB1BR GSCs by using Kolmogorov-Smirnov test. We identified 181 significant genes out of 757 genes and removed them from the list, resulting 576 candidate lethal genes of BUB1BR GSCs.

**Construction of glioblastoma-specific regulatory network**

We *de novo* constructed a GBM regulatory network by using a previously described procedure ([11](#_ENREF_11),[12](#_ENREF_12)) from over 421 TCGA GBM tumor samples ([13](#_ENREF_13)) by integrating gene expression and DNA copy number variation data ([14](#_ENREF_14),[15](#_ENREF_15)).

**BUB1BS/R specific lethal sub-network analysis**

We projected screen hits onto our GBM regulatory network. 62 and 170 candidate hits of BUB1BS and BUB1BR GSCs appeared as nodes in the GBM network. The sub-networks in the GBM network were examined by investigation of these 62 and 170 candidates’ neighborhoods, representing the BUB1BS lethal sub-network and the BUB1BR lethal sub-network. The closely located candidates in regulatory network will be connected each other and construct bigger sub-network.

We selected significantly large BUB1BS specific and BUB1BR specific lethal sub-network as follows. First, we selected significantly large sub-network. We randomly selected 62 and 170 of genes from the GBM regulatory network, and counted the number of genes for each connected sub-network. We performed this procedure 1000 times and find number of genes that is significantly big compared to other sub-networks (p-value 0.05). We found 22 and 14 genes as the number of genes corresponding to p-value 0.05, for BUB1BS andBUB1BR sub-network respectively. This results in three significantly large sub-networks for both BUB1BS and BUB1BR sub-networks. Secondly, we detected the subtype specific lethal sub-network by filtering out sub-networks that have more than one lethal gene that is not included in that subtype specific lethal genes; BUB1BR lethal sub-network should not include more than one BUB1BS lethal genes or cancer lethal genes. Based on this procedure, we detected two BUB1BS lethal sub-network.

**Principle Component Analysis based on the expression profiles.**

To investigate the global view of expression levels, we performed Principle Component Analysis (PCA) based on the gene expression levels of all samples including GSC, NSC cell lines and astrocytes. The contribution of each sample to PC1 and PC2 were plotted (**Fig. S1**). PCA separated the samples into groups corresponding to the cell type as well as the BUB1BS/R status. The position of samples along PC1 and PC2 were highly correlated with cell types; the astrocytes were separated as one group even though they have the different BUB1BS/R status.

We also performed PCA based on the gene expression levels of tissue and GSC from the Mount Sinai GBM patients. The contribution of each sample to PC1 and PC2 were plotted (**Fig. S4A**). PCA separated the samples into groups corresponding to their types, tissue or GSC.

**Pathway enrichment**

We performed pathway enrichment analysis for genes of interests (e.g. genes associated with the BUB1BS/R status for **Fig. S2** or genes within sub-networks for **Figure 3**). We collected the functional annotation in terms of 1320 canonical pathways from BioCarta, KEGG and Reactome ([16](#_ENREF_16)) and Gene Ontology (GO) categories, and performed enrichment analysis of genes of interests using Fisher’s exact test. The FDR corresponding to a given p-value threshold was computed as the ratio of the number of pathways or GO categories with a p-value below threshold, averaged over 50 randomized data sets, and the number of pathway or GO categories with p-value below threshold. A 1% FDR based on the empirical permutation test corresponds to a Fisher’s exact test p-value <5x10-2, for canonical pathways, and p-value <1x10-3 for GO categories.

**Normal brain cell expression data: GSE67835**

The expression levels of diverse normal brain cells ([17](#_ENREF_17)) were used to define profiles of normal cell within brain. We downloaded the raw RNA-seq data from <http://www.ncbi.nlm.nih.gov/sra> (accession no. SRP057196), which measures gene expression levels at single cell level for 466 cells with 9 different cell types in human brain. The cell types include astrocytes, endothelial, microglia, neurons, oligodendrocytes, OPC, fetal_quiescent, fetal_replicating, and hybrid. We excluded three cell types (i.e. fetal_quiescent, fetal_replicating, and hybrid) for our further analysis. We converted .sra files to .fastq file and followed the same procedure with that of our GSC data to measure gene expression level as a FPKM value.

**GBM cohort data set: TCGA data**

All TCGA cancer data set were downloaded from “The Cancer Genome Atlas” data portal (https://tcga-data.nci.nih.gov/tcga/tcgaHome2.jsp). For microarray data, we downloaded Level 3 gene expression levels measured in Agilent microarray for 615 samples, Affymetrix microarray for 558 samples. For RNA-seq data, we downloaded Level 1 data files and followed the same procedure with that of our GSC data to measure gene expression level as a FPKM value. FPKM+1 values were used for allowing log transformation. The microarray and RNA-seq mRNA expression values were log2 transformed for all subsequent analysis. Each data set includes 596, 548, and 156 primary tumor samples for Agilent, Affymetrix, and RNA-seq, respectively. For the samples with replicates or triplicates, the average expression levels were used for 579, 529, and 154 unique samples for Agilent, Affymetrix, and RNA-seq, respectively. For Copy Number Variation (CNV) data of GBM, we downloaded the result from GISTIC used in the previous TCGA study ([18](#_ENREF_18)), which estimates copy number for each gene across all samples.

**GBM cohort data set: Gravendeel *et al.* data**

We further used the previous data set that measured gene expression profile of 283 glioma samples including 159 GBM samples ([19](#_ENREF_19)) and 124 LGG samples. We downloaded RMA-normalized expression levels from Gene Expression Omnibus (GEO) (Accession number GSE16011). All the corresponding survival information was also available. We only used 159 GBM samples for the further analysis.

**Cell line data set: CCLE and CGP data sets**

We downloaded expression levels of 1037 cancer cell lines processed using Robust Multi-array Average (RMA) and normalized using quantile normalization from the Cancer Cell Line Encyclopedia (CCLE) ([20](#_ENREF_20)). All annotation data including cell line annotation and pharmacological profiling drug data associated with CCLE were downloaded from the same website (<http://www.broadinstitute.org/ccle/home>). This includes 62 glioma cancer cell lines. We excluded 3 cell lines (i.e. GI-1, H4, and SNU738) that are not inherited from astrocytomas, resulting 59 cell lines analyzed. We also downloaded normalized gene expression data of 789 cancer cell lines including 43 glioma cell lines (only astrocytomas) from the Genomics of Drug Sensitivity in Cancer project (<http://www.cancerrxgene.org/>) ([21](#_ENREF_21)). The corresponding drug sensitivity data was downloaded the same website.

**Orthotropic xenograft tumor data: Joo *et al.* data**

We downloaded the data set that measured gene expression profile of 58 GBM patients with the parallel in vivo xenograft tumors. The expression data were downloaded from Gene Expression Omnibus (GEO) (Accession number GSE42669) with the clinical information. The tumor invasion of human patient and in vivo tumor invasion of each xenograft was shown in Table 1 in Joo et al., ([22](#_ENREF_22)).

**GBM single cell data: Patel *et al*. data**

We analyzed single cell transcriptomes from five tumors and stemlike tumor-propagating glioblastoma cells (GBM6 and GBM8), and population controls including bulk samples for five tumors and stemlikes cells from three tumors. The expression data were downloaded from Gene Expression Omnibus (GEO) (Accession number GSE57872). We downloaded the raw RNA-seq data (accession no. SRP042161), then converted .sra files to .fastq file using the SRA toolkit suite. Next, sequencing reads were aligned to the human reference genome hg19 using TopHat ([6](#_ENREF_6)), then, the mapped sequences were aligned with htseq-count to quantify the read counts for each gene ([23](#_ENREF_23)). The trimmed mean of M-values normalization (TMM) was used to estimate normalized counts and log2 transformed expression levels by using edgeR R package ([24](#_ENREF_24)). Data was processed as described below using log2 transformed counts per millions. Genes with non-expression for more than 40% samples were filtered out, resulting 6006 genes. Cells expressing less than 1500 out of 6006 genes were excluded, resulting 570 cells out of 875. We further filtered out cells with too low (<0.3) or too large normalization factors based on TMM (> 1.3) were filtered out, resulting in 480 cells in total. For each single cell sample or population controls, we applied our BUB1BR/S classifier and identified predicted values from elastic net.

**Association between drug sensitivity and BUB1BS/R status**

We used two available drug sensitivity measurements, the concentration at which the drug response reached an absolute inhibition of 50% (IC50) and an ‘activity area’ to capture simultaneously the efficacy and potency of a drug ([20](#_ENREF_20)). For CCLE, 8-point dose–response curves for 24 compounds across 479 cell lines were generated to estimate IC50 and an activity area. For CGP, the 130 drugs selected for screening, and they assayed 48,178 drug–cell-line combinations with a range of 275–507 cell lines screened per drug ([21](#_ENREF_21)). The effect of 72h of drug treatment on cell viability was used to estimate the half-maximal inhibitory concentration (IC50), area under the slope of the dose–response curve (AUC). For IC50, we used negative log-transformed values, and for AUC, we used 1-AUC values that corresponding to activity area for further analysis. For both measurements, the higher value represents more sensitive to the treated drug.

**Measure drug sensitivity of Etoposide and Irinotecan in GSCs.**

The effects of Etoposide and Irinotecan on GSC isolates were determined by treating them with various concentrations of each drug for incubation periods 72h at concentrations ranging from 0.001 μM to 1mM. Cells were passaged and cultured in serum free medium (StemCell Tech, Cat#: 05751). Sterile 96 well plates were coated with Laminin (Corning, Cat#: 354232) for 2 hours.  The cultures were exposed to digest Accutase (Innovative cell tech, Cat#: AT-104) and seeded in the center 72 wells of the plate with concentration of at least 5000 cells per well and with 200 microliters of media.  The plates were then incubated in a 37 degree incubator with 5% CO2 and 90% humidity until they reached 30% confluence over the bottom of the plate.  After trypsinization and seeding into coated 96-well plates, cultures grew as either monolayers (10647B) or attached gliomaspheres (9217B). Monolayers were observed daily for confluence, while attached spheres were observed daily for increasing average sphere diameter. When it could be determined that confluence was 70%, or that spheres were progressively enlarging in diameter greater than 10 cell diameters (generally, 3 to 4 days) the inhibitor agent was applied.  At this time, the 200 microliters of media was removed and replaced with media and various concentrations of the test compounds.  Concentrations of Irinotecan between 0.01-1000 micromolar and Etoposide between 1-4000 micromolar were tested in quadruplicate and sextuplicate, respectively.  Eight wells in each plate were dedicated to cultures exposed to no drug.  The two external lanes that lacked cells were filled with 200 microliters of media. These plates were then incubated for 72 hours.  At the conclusion of this time period, 40 microliters of MTS agent (ProMega cat#G3580) was added and mixed with each culture as well as 4 of the wells without cells.  The cells were incubated for 1 hour prior to exposure with the spectrophotometer for 4 hours. At the time of absorbance reading, each well was mixed thoroughly and read in the spectrophotometer at 490 nm absorbance.

The drug concentrations (x-axis in Figure 5 BC) were log10 transformed and plotted against normalized cell growth based on negative controls. The nonlinear regression (sigmoidal dose-response with variable slope) was fitted by using GraphPad Prism (GraphPad Software, Inc., San Diego, CA).

**Supplementary Fig. S1. Principle component analysis (PCA) of gene expression levels.** Each dot represents one of samples in multidimensional gene expression space projected on principal plane formed by first (x-axis) and second principal axes (y-axis). The color indicates cell types (e.g. GSC, NSC or astrocyte) and BUB1B-inhibition sensitiveness.

**Supplementary Fig. S2. Gene set enrichment analysis of the 838 BUB1BS/R-associated genes.** The 838 BUB1BS/R-associated genes were significantly enriched for cell cycle related pathways such as the mitotic cell cycle

**Supplementary Fig. S3. Cross-validation of the elastic net classifier.** The results of cross-validation show mean squared error for variable elastic net penalty and the regularization parameter . This indicates that the elastic net classifier based on the genes associated with BUB1BS/R can achieve low mean squared error. The selected and were 0.01.

**Supplementary Fig. S4. Expression features based on tumor tissue and GSC.** (**A**) Principle component analysis (PCA) of gene expression levels for tumor tissue and GSC. Each dot represents one of samples in multidimensional gene expression space projected on principal plane formed by first (x-axis) and second principal axes (y-axis). The color indicates types of cell, tumor tissue (green) and GSC (orange). (**B**) The prediction of the BUB1BR/S status based on tumor tissue expression (y-axis) and GSC expression (x-axis). (**C**) The prediction of the BUB1BR/S status based on tumor tissue expression (y-axis) and the predicted proportion of normal cells in the tumor tissues (x-axis). (**D**) The histological staining of tumor tissues for 9217A and 10647C. (**E**) The prediction of the BUB1BR/S status based on the deconvoluted expression profiles of GBM tumor compartment for tumor tissue (y-axis) and GSC expression (x-axis).

**Supplementary Fig. S5. Association between predicted BUB1B-inhibition sensitivity values and clinical information.** (**A**) Association between predicted sensitivity values and gender or the methylation status of *MGMT* promoter were shown for each data set, which is not significantly associated with for any data sets. (**B**) Association between predicted sensitivity values and age at diagnosis.

**Supplementary Fig. S6. BUB1BS and BUB1BR-specific sub-networks.** (**A**) BUB1BS-specific sub-networks, which were enriched for candidate lethal hits of BUB1BS GSC isolates; (**B**) BUB1BR-specific sub-networks, which were enriched for candidate lethal hits of BUB1BR GSC isolates. The color indicates BUB1BS/R lethality.

**Supplementary Fig. S7. Expression difference between BUB1BS GSCs and BUB1BR GSCs.** Genes are within two lethal sub-networks that are to BUB1BS cells. The expression levels of these genes were mostly up-regulated for BUB1BS GSCs

**Supplementary Fig. S8. The Predicted BUB1B-inhibition sensitivity values of glioma cell lines. (A**) Expression values from Cancer Cell Line Encyclopedia (CCLE) database (**B**) Expression values from Cancer Genome Project (CGP) database.

**Supplementary Fig. S9. Boxplot of drug sensitivity for glioma cell lines.** –log(IC50) for glioma cell lines from CGP data were shown in x-axis. Rows represent different drugs. Red indicates sensitivity for Camptothecin.

**Supplementary Fig. S10.** **Application of BUB1BR/S classifier to single cell RNA-seq data of two stemlike tumor-propagating glioblastoma cells (GBM6 and GBM8).** For each tumor sample, the number of genes with non-expressed levels and predicted values from elastic net were shown for each single cell data.

**Supplementary Fig. S11.** **Application of BUB1BR/S classifier to single cell RNA-seq data.** (**A-E**) For each tumor sample, the number of genes with non-expressed levels and predicted values from elastic net were shown for each single cell data (left panel). The application of BUB1B classifier to population controls including bulk samples for five tumors (green), stemlikes cells from three tumors (orange), and estimated GBM tumor cell signatures (yellow) from bulk samples were shown (right panel).

**Supplementary Fig. S12.** The application of BUB1B classifier to population controls including bulk samples for three tumors (green) and its corresponding stemlikes cells GSC cell (orange), and estimated GBM tumor cell signatures from bulk samples were shown (yellow).

**Supplementary Table S1.** **Summary of GSC samples and prediction of BUB1B sensitivity for GSC cell lines based on expression levels.** The long IKD corresponds to BUB1BR and short IKD corresponds to BUB1BS.

| Sample | Cell Type | Subtype1 | IKD | References2 | BUB1BR/S  subtype3 | Number of Mapped4 | Inferred BUB1BR/S  subtype5 |
| --- | --- | --- | --- | --- | --- | --- | --- |
| 022T-1 | GSC | Class | nd | ([22](#_ENREF_22)) | sensitive | 17218660 | - |
| 022T-2 | GSC | Class | nd | ([22](#_ENREF_22)) | sensitive | 12066766 | - |
| 022T-3 | GSC | Class | nd | ([22](#_ENREF_22)) | sensitive | 15486051 | - |
| 1406_No1 | GSC | nd | nd | ([25](#_ENREF_25)) | nd | 68523679 | resistant |
| 1406_No2 | GSC | nd | nd | ([25](#_ENREF_25)) | nd | 65193963 | resistant |
| 1406_No3 | GSC | nd | nd | ([25](#_ENREF_25)) | nd | 70733210 | resistant |
| 1502_No1 | GSC | nd | long | ([25](#_ENREF_25)) | resistant | 65807734 | - |
| 1502_No2 | GSC | nd | long | ([25](#_ENREF_25)) | resistant | 74986546 | - |
| 1502_No3 | GSC | nd | long | ([25](#_ENREF_25)) | resistant | 73213380 | - |
| 448T-1 | GSC | ProN | nd | ([22](#_ENREF_22)) | nd | 11129996 | sensitive |
| 448T-2 | GSC | ProN | nd | ([22](#_ENREF_22)) | nd | 13053546 | sensitive |
| 448T-3 | GSC | ProN | nd | ([22](#_ENREF_22)) | nd | 13872398 | sensitive |
| 559T-1 | GSC | Class | nd | ([22](#_ENREF_22)) | nd | 13823820 | sensitive |
| 559T-2 | GSC | Class | nd | ([22](#_ENREF_22)) | nd | 9643535 | sensitive |
| 559T-3 | GSC | Class | nd | ([22](#_ENREF_22)) | nd | 9737972 | sensitive |
| 777T-1 | GSC | Mes | long |  | resistant | 8831370 | - |
| 777T-2 | GSC | Mes | long |  | resistant | 9825263 | - |
| 777T-3 | GSC | Mes | long |  | resistant | 9713198 | - |
| G14-1 | GSC | Mes | nd | ([1](#_ENREF_1),[26](#_ENREF_26)) | sensitive | 7903500 | - |
| G14-2 | GSC | Mes | nd | ([1](#_ENREF_1),[26](#_ENREF_26)) | sensitive | 11743792 | - |
| G14-3 | GSC | Mes | nd | ([1](#_ENREF_1),[26](#_ENREF_26)) | sensitive | 13264587 | - |
| G19-1 | GSC | Mes | nd | ([26](#_ENREF_26)) | sensitive | 10950939 | - |
| G19-2 | GSC | Mes | nd | ([26](#_ENREF_26)) | sensitive | 9800196 | - |
| G19-3 | GSC | Mes | nd | ([26](#_ENREF_26)) | sensitive | 10321977 | - |
| G21-1 | GSC | Mes | long | ([26](#_ENREF_26)) | resistant | 11396494 | - |
| G21-2 | GSC | Mes | long | ([26](#_ENREF_26)) | resistant | 13053483 | - |
| G21-3 | GSC | Mes | long | ([26](#_ENREF_26)) | resistant | 9970826 | - |
| G25-1 | GSC | ProN | nd | ([26](#_ENREF_26)) | nd | 1943505 | - |
| G25-2 | GSC | ProN | nd | ([26](#_ENREF_26)) | nd | 1818711 | - |
| G25-3 | GSC | ProN | nd | ([26](#_ENREF_26)) | nd | 1824227 | - |
| G26-1 | GSC | Class | nd | ([26](#_ENREF_26)) | sensitive | 9879966 | - |
| G26-2 | GSC | Class | nd | ([26](#_ENREF_26)) | sensitive | 12204276 | - |
| G26-3 | GSC | Class | nd | ([26](#_ENREF_26)) | sensitive | 9914092 | - |
| G7-1 | GSC | Class | nd | ([26](#_ENREF_26)) | sensitive | 9078974 | - |
| G7-2 | GSC | Class | nd | ([26](#_ENREF_26)) | sensitive | 6569400 | - |
| G7-3 | GSC | Class | nd | ([26](#_ENREF_26)) | sensitive | 13912425 | - |
| 0131-02-11 | GSC | Mes | short | ([27](#_ENREF_27)) | sensitive | 19436150 | - |
| 0131-02-17 | GSC | Mes | short | ([27](#_ENREF_27)) | sensitive | 20140257 | - |
| 0131-02-22 | GSC | Mes | short | ([27](#_ENREF_27)) | sensitive | 17543654 | - |
| 0827-02-11 | GSC | ProN | long | ([27](#_ENREF_27)) | resistant | 20551319 | - |
| 0827-02-17 | GSC | ProN | long | ([27](#_ENREF_27)) | resistant | 21554736 | - |
| 0827-02-22 | GSC | ProN | long | ([27](#_ENREF_27)) | resistant | 24459202 | - |
| 1228-02-11 | GSC | Class | short | ([27](#_ENREF_27)) | sensitive | 18777360 | - |
| 1228-02-17 | GSC | Class | short | ([27](#_ENREF_27)) | sensitive | 18424705 | - |
| 1228-02-22 | GSC | Class | short | ([27](#_ENREF_27)) | sensitive | 22849171 | - |
| G144-02-11 | GSC | nd | nd | ([1](#_ENREF_1),[26](#_ENREF_26)) | nd | 22919924 | resistant |
| G144-02-17 | GSC | nd | nd | ([1](#_ENREF_1),[26](#_ENREF_26)) | nd | 21570557 | resistant |
| G144-02-22 | GSC | nd | nd | ([1](#_ENREF_1),[26](#_ENREF_26)) | nd | 20291669 | resistant |
| G166-02-11 | GSC | Mes | short | ([1](#_ENREF_1),[26](#_ENREF_26)) | sensitive | 21740976 | - |
| G166-02-17 | GSC | Mes | short | ([1](#_ENREF_1),[26](#_ENREF_26)) | sensitive | 21874363 | - |
| G166-02-22 | GSC | Mes | short | ([1](#_ENREF_1),[26](#_ENREF_26)) | sensitive | 21791876 | - |
| G179-02-11 | GSC | Mes | short | ([1](#_ENREF_1),[26](#_ENREF_26)) | sensitive | 20952757 | - |
| G179-02-17 | GSC | Mes | short | ([1](#_ENREF_1),[26](#_ENREF_26)) | sensitive | 21982156 | - |
| G179-02-22 | GSC | Mes | short | ([1](#_ENREF_1),[26](#_ENREF_26)) | sensitive | 23536076 | - |
| CB660-02-11 | NSC | nd | long | ([28](#_ENREF_28)) | resistant | 19426184 | - |
| CB660-02-17 | NSC | nd | long | ([28](#_ENREF_28)) | resistant | 19540543 | - |
| CB660-02-22 | NSC | nd | long | ([28](#_ENREF_28)) | resistant | 18931092 | - |
| NHA-1 | astrocyte | Mes | long |  | resistant | 11254979 | - |
| NHA-2 | astrocyte | Mes | long |  | resistant | 11856853 | - |
| NHA-3 | astrocyte | Mes | long |  | resistant | 8544432 | - |
| NHA-RAS-1 | astrocyte+RasV12 | Mes | short |  | sensitive | 15662578 | - |
| NHA-RAS-2 | astrocyte+Ras V12 | Mes | short |  | sensitive | 13556713 | - |
| NHA-RAS-3 | astrocyte+Ras V12 | Mes | short |  | sensitive | 11143848 | - |

1Subtypes determined by previous classification ([29](#_ENREF_29)). 2Refereces of cell lines. 3The sensitivity to BUB1B-inhibition. 4Number of mapped sequences by Tophat ([6](#_ENREF_6)). 5The sensitivity status to BUB1B-inhibtion inferred by expression levels. “—“ indicates no data available or not inferred. “nd” represents not-determined.

**Supplementary Table S2**. **Composition of each cell type based on tumor tissue expression levels.**

| Sample | OPC | Astrocytes | | Endothelial | Microglia | Neurons | Oligodendrocytes | GBM tumor cells |
| --- | --- | --- | --- | --- | --- | --- | --- | --- |
| 7653_B_tissue | 0 | 0.1702 | 0.24783 | | 0 | 0.07068 | 0.00964 | 0.50154 |
| 9212_A_tissue | 0 | 0.0706 | 0.21585 | | 0.05407 | 0.04717 | 0.05672 | 0.55548 |
| 9212_B_tissue | 0 | 0.1171 | 0.28122 | | 0.06715 | 0.07363 | 0.06344 | 0.39736 |
| 9217_A_tissue | 0 | 0.2187 | 0.11978 | | 0.07502 | 0.13651 | 0.25404 | 0.19582 |
| 9217_B_tissue | 0 | 0.1236 | 0.29320 | | 0.04178 | 0.02933 | 0.05410 | 0.45788 |
| 10647A_tissue | 0 | 0.0032 | 0.39100 | | 0.10866 | 0 | 0.01603 | 0.48102 |
| 10647B_tissue | 0 | 0 | 0.43412 | | 0.10567 | 0 | 0 | 0.46019 |
| 10647C_tissue | 0 | 0.0657 | 0.30755 | | 0.12616 | 0.04266 | 0.13983 | 0.31800 |
| 9260B_tissue | 0 | 0.0947 | 0.43317 | | 0.08710 | 0.00711 | 0 | 0.37787 |

**Supplementary Table S3. Association between BUB1BS/R status and survival rate.** The survival association was performed for TCGA data([13](#_ENREF_13)), Gravendeel *et al.,*([19](#_ENREF_19))*,* and Joo *et al*., data set([22](#_ENREF_22)).

| Study | Platform | # samples | p-value by Cox1 | | | |
| --- | --- | --- | --- | --- | --- | --- |
| GSC3 | GSC: age + BUB1B4 | Tissue5 | Tissue:age +BUB1B6 |
| TCGA | RNA-seq | 154 | 0.0500 | 0.0080 | 0.2903 | 0.3385 |
|  | Agilent | 574 | 0.0185 | 0.15 | 0.0286 | 0.33 |
|  | Affymetrix | 529 | 0.0405 | 0.40 | 0.0747 | 0.51 |
| Gravendeel *et al.* | Affymetrix | 159 | 0.0097 | 0.025 | 0.0638 | 0.427 |
| Joo *et al.* | Affymetrix | 58 | 0.0035 | 0.0063 | 0.0064 | 0.915 |

1p-value of effect of predicted sensitivity value by fitting cox proportional hazards model ([30](#_ENREF_30)). The BUB1BS/R status is measured by 3-4molecular signature of GSC compartment or 5-6bulk tissue expression levels. 4,6Age is added as covariate in cox proportional hazards models.

**Supplementary Table S4. Normalized cell growth (%) of 9217B and 10647B for etoposide treatment.**

| **Concentration(μM)** | **10647B** | | | | | | | | | | |
| --- | --- | --- | --- | --- | --- | --- | --- | --- | --- | --- | --- |
| 0 | 98.87 | 102.10 | | 100.10 | | 111.80 | | 94.19 | | 92.95 | |
| 1 | 104.95 | 115.33 | | 107.93 | | 109.20 | | 99.38 | | 92.36 | |
| 10 | 94.70 | 119.50 | | 114.35 | | 110.35 | | 93.63 | | 81.98 | |
| 50 | 73.77 | 101.84 | | 88.78 | | 82.27 | | 65.17 | | 69.04 | |
| 100 | 70.66 | 90.10 | | 87.17 | | 87.12 | | 77.04 | | 62.58 | |
| 250 | 68.28 | 73.26 | | 74.91 | | 80.02 | | 58.83 | | 50.75 | |
| 500 | 62.20 | 67.56 | | 79.81 | | 75.81 | | 67.47 | | 52.96 | |
| 1000 | 58.15 | 71.77 | | 79.21 | | 83.64 | | 75.00 | | 61.85 | |
| 2000 | 61.60 | 63.09 | | 68.49 | | 66.41 | | 56.79 | | 52.79 | |
| 4000 | 50.88 | 54.54 | | 50.20 | | 52.37 | | 50.88 | | 50.11 | |
| **Concentration(μM)** | **9217B** | | | | | | | | | | |
| 0 | 110.67 | | 97.28 | | 92.87 | | 96.02 | | 100.59 | | 102.56 | |
| 1 | 103.82 | | 94.13 | | 87.67 | | 90.74 | | 94.21 | | 100.83 | |
| 10 | 96.26 | | 93.74 | | 83.73 | | 87.51 | | 94.29 | | 91.45 | |
| 50 | 70.89 | | 71.60 | | 68.61 | | 66.01 | | 68.37 | | 76.80 | |
| 100 | 58.92 | | 55.93 | | 56.56 | | 60.50 | | 57.82 | | 55.77 | |
| 250 | 37.18 | | 36.16 | | 34.34 | | 31.67 | | 36.63 | | 36.00 | |
| 500 | 25.44 | | 24.97 | | 27.41 | | 26.47 | | 24.18 | | 25.05 | |
| 1000 | 21.27 | | 21.50 | | 22.21 | | 21.58 | | 19.69 | | 19.46 | |
| 2000 | 16.70 | | 16.38 | | 18.43 | | 17.80 | | 14.34 | | 15.05 | |

**References**

1. Pollard SM, Yoshikawa K, Clarke ID, Danovi D, Stricker S, Russell R*, et al.* Glioma stem cell lines expanded in adherent culture have tumor-specific phenotypes and are suitable for chemical and genetic screens. Cell Stem Cell **2009**;4:568-80

2. Sonoda Y, Ozawa T, Hirose Y, Aldape KD, McMahon M, Berger MS*, et al.* Formation of intracranial tumors by genetically modified human astrocytes defines four pathways critical in the development of human anaplastic astrocytoma. Cancer research **2001**;61:4956-60

3. Ding Y, Hubert CG, Herman J, Corrin P, Toledo CM, Skutt-Kakaria K*, et al.* Cancer-Specific requirement for BUB1B/BUBR1 in human brain tumor isolates and genetically transformed cells. Cancer discovery **2013**;3:198-211

4. Toledo CM, Herman JA, Olsen JB, Ding Y, Corrin P, Girard EJ*, et al.* BuGZ is required for Bub3 stability, Bub1 kinetochore function, and chromosome alignment. Developmental cell **2014**;28:282-94

5. DeLuca JG, Musacchio A. Structural organization of the kinetochore-microtubule interface. Current opinion in cell biology **2012**;24:48-56

6. Trapnell C, Pachter L, Salzberg SL. TopHat: discovering splice junctions with RNA-Seq. Bioinformatics **2009**;25:1105-11

7. Trapnell C, Williams BA, Pertea G, Mortazavi A, Kwan G, van Baren MJ*, et al.* Transcript assembly and quantification by RNA-Seq reveals unannotated transcripts and isoform switching during cell differentiation. Nature biotechnology **2010**;28:511-5

8. Zou H, Hastie T. Regularization and Variable Selection via the Elastic Net. Journal of the Royal Statistical Society Series B (Statistical Methodology) **2005**;67:301-20

9. Friedman JH, Hastie T, Tibshirani R. Regularization Paths for Generalized Linear Models via Coordinate Descent. 2010 **2010**;33:22

10. Hubert CG, Bradley RK, Ding Y, Toledo CM, Herman J, Skutt-Kakaria K*, et al.* Genome-wide RNAi screens in human brain tumor isolates reveal a novel viability requirement for PHF5A. Genes & development **2013**;27:1032-45

11. Zhu J, Lum PY, Lamb J, GuhaThakurta D, Edwards SW, Thieringer R*, et al.* An integrative genomics approach to the reconstruction of gene networks in segregating populations. Cytogenet Genome Res **2004**;105:363-74

12. Zhu J, Wiener MC, Zhang C, Fridman A, Minch E, Lum PY*, et al.* Increasing the Power to Detect Causal Associations by Combining Genotypic and Expression Data in Segregating Populations. PLoS Comput Biol **2007**;3:e69

13. Cancer Genome Atlas Research N. Comprehensive genomic characterization defines human glioblastoma genes and core pathways. Nature **2008**;455:1061-8

14. Zhu J, Zhang B, Smith EN, Drees B, Brem RB, Kruglyak L*, et al.* Integrating large-scale functional genomic data to dissect the complexity of yeast regulatory networks. Nat Genet **2008**;40:854-61

15. Tran LM, Zhang B, Zhang Z, Zhang C, Xie T, Lamb JR*, et al.* Inferring causal genomic alterations in breast cancer using gene expression data. BMC Syst Biol **2011**;5:121

16. Subramanian A, Tamayo P, Mootha VK, Mukherjee S, Ebert BL, Gillette MA*, et al.* Gene set enrichment analysis: a knowledge-based approach for interpreting genome-wide expression profiles. Proc Natl Acad Sci U S A **2005**;102:15545-50

17. Darmanis S, Sloan SA, Zhang Y, Enge M, Caneda C, Shuer LM*, et al.* A survey of human brain transcriptome diversity at the single cell level. Proceedings of the National Academy of Sciences of the United States of America **2015**;112:7285-90

18. Brennan CW, Verhaak RG, McKenna A, Campos B, Noushmehr H, Salama SR*, et al.* The somatic genomic landscape of glioblastoma. Cell **2013**;155:462-77

19. Gravendeel LA, Kouwenhoven MC, Gevaert O, de Rooi JJ, Stubbs AP, Duijm JE*, et al.* Intrinsic gene expression profiles of gliomas are a better predictor of survival than histology. Cancer research **2009**;69:9065-72

20. Barretina J, Caponigro G, Stransky N, Venkatesan K, Margolin AA, Kim S*, et al.* The Cancer Cell Line Encyclopedia enables predictive modelling of anticancer drug sensitivity. Nature **2012**;483:603-7

21. Garnett MJ, Edelman EJ, Heidorn SJ, Greenman CD, Dastur A, Lau KW*, et al.* Systematic identification of genomic markers of drug sensitivity in cancer cells. Nature **2012**;483:570-5

22. Joo KM, Kim J, Jin J, Kim M, Seol HJ, Muradov J*, et al.* Patient-specific orthotopic glioblastoma xenograft models recapitulate the histopathology and biology of human glioblastomas in situ. Cell reports **2013**;3:260-73

23. Anders S, Pyl PT, Huber W. HTSeq--a Python framework to work with high-throughput sequencing data. Bioinformatics **2015**;31:166-9

24. Robinson MD, McCarthy DJ, Smyth GK. edgeR: a Bioconductor package for differential expression analysis of digital gene expression data. Bioinformatics **2010**;26:139-40

25. Liu Z, Zhao X, Mao H, Baxter PA, Huang Y, Yu L*, et al.* Intravenous injection of oncolytic picornavirus SVV-001 prolongs animal survival in a panel of primary tumor-based orthotopic xenograft mouse models of pediatric glioma. Neuro-oncology **2013**;15:1173-85

26. Engstrom PG, Tommei D, Stricker SH, Ender C, Pollard SM, Bertone P. Digital transcriptome profiling of normal and glioblastoma-derived neural stem cells identifies genes associated with patient survival. Genome medicine **2012**;4:76

27. Son MJ, Woolard K, Nam DH, Lee J, Fine HA. SSEA-1 is an enrichment marker for tumor-initiating cells in human glioblastoma. Cell stem cell **2009**;4:440-52

28. Sun Y, Pollard S, Conti L, Toselli M, Biella G, Parkin G*, et al.* Long-term tripotent differentiation capacity of human neural stem (NS) cells in adherent culture. Molecular and cellular neurosciences **2008**;38:245-58

29. Parsons DW, Jones S, Zhang X, Lin JC, Leary RJ, Angenendt P*, et al.* An integrated genomic analysis of human glioblastoma multiforme. Science **2008**;321:1807-12

30. Cox DR. Regression Models and Life-Tables. Journal of the Royal Statistical Society Series B (Methodological) **1972**;34:187-220
